# Supplementary material
Source: MDPI journal article supplement (https://www.mdpi.com/2304-6740/11/11/437)
Supplement: s1 [file s1]

Supplementary Information

# **Ammonium and Phosphonium Salts Containing Monoanionic Iron(II) Half-Sandwich Complexes [Fe( $\eta^5$ -Cp<sup>\*</sup>)X<sub>2</sub>]<sup>−</sup> (X = Cl – I)**

**Julian Zinke <sup>1</sup>, Clemens Bruhn <sup>1</sup> and Ulrich Siemeling <sup>1,\*</sup>**

Institute of Chemistry, University of Kassel, Heinrich-Plett-Str. 40, 34132 Kassel, Germany

\* Correspondence: siemeling@uni-kassel.de



**Table S1.** X-ray crystallographic details.

|                                             | NnPr <sub>4</sub> [Fe( $\eta^5$ -Cp*)Cl <sub>2</sub> ] | NnPr <sub>4</sub> [Fe( $\eta^5$ -Cp*)BrCl] | NnPr <sub>4</sub> [Fe( $\eta^5$ -Cp*)Br <sub>2</sub> ] | PPh <sub>4</sub> [Fe( $\eta^5$ -Cp*)Cl <sub>2</sub> ] | PPh <sub>4</sub> [Fe( $\eta^5$ -Cp*)Br <sub>2</sub> ] | PPh <sub>4</sub> [Fe( $\eta^5$ -Cp*)I <sub>2</sub> ] | [Fe( $\eta^5$ -Cp*)Cl(CO) <sub>2</sub> ]           |
|---------------------------------------------|--------------------------------------------------------|--------------------------------------------|--------------------------------------------------------|-------------------------------------------------------|-------------------------------------------------------|------------------------------------------------------|----------------------------------------------------|
| Empirical formula                           | C <sub>22</sub> H <sub>43</sub> Cl <sub>2</sub> FeN    | C <sub>22</sub> H <sub>43</sub> BrClFeN    | C <sub>22</sub> H <sub>43</sub> Br <sub>2</sub> FeN    | C <sub>34</sub> H <sub>35</sub> Cl <sub>2</sub> FeP   | C <sub>34</sub> H <sub>35</sub> Br <sub>2</sub> FeP   | C <sub>34</sub> H <sub>35</sub> FeI <sub>2</sub> P   | C <sub>12</sub> H <sub>15</sub> ClFeO <sub>2</sub> |
| Formula weight                              | 448.32                                                 | 492.78                                     | 537.24                                                 | 601.34                                                | 690.26                                                | 784.24                                               | 282.54                                             |
| Crystal system                              | triclinic                                              | triclinic                                  | orthorhombic                                           | orthorhombic                                          | orthorhombic                                          | orthorhombic                                         | triclinic                                          |
| Space group                                 | <i>P</i> -1                                            | <i>P</i> -1                                | <i>Pca</i> 2 <sub>1</sub>                              | <i>Pna</i> 2 <sub>1</sub>                             | <i>Pnma</i>                                           | <i>Pnma</i>                                          | <i>P</i> -1                                        |
| <i>a</i> /Å                                 | 8.5399(4)                                              | 8.526(2)                                   | 34.9997(10)                                            | 29.237(7)                                             | 29.7108(15)                                           | 30.170(2)                                            | 7.4528(16)                                         |
| <i>b</i> /Å                                 | 12.3334(5)                                             | 12.334(2)                                  | 12.6237(4)                                             | 7.5015(9)                                             | 14.0744(7)                                            | 14.3281(14)                                          | 7.6886(16)                                         |
| <i>c</i> /Å                                 | 14.2796(6)                                             | 14.310(3)                                  | 23.2128(7)                                             | 14.075(4)                                             | 7.4002(3)                                             | 7.4587(5)                                            | 11.905(4)                                          |
| $\alpha$ /°                                 | 69.433(3)                                              | 69.577(13)                                 | 90                                                     | 90                                                    | 90                                                    | 90                                                   | 79.38(2)                                           |
| $\beta$ /°                                  | 79.375(3)                                              | 79.840(17)                                 | 90                                                     | 90                                                    | 90                                                    | 90                                                   | 78.75(2)                                           |
| $\gamma$ /°                                 | 86.175(3)                                              | 85.489(18)                                 | 90                                                     | 90                                                    | 90                                                    | 90                                                   | 69.59 0(16)                                        |
| Volume/Å <sup>3</sup>                       | 1384.00(11)                                            | 1388.0(5)                                  | 10256.0(5)                                             | 3087.0(13)                                            | 3094.5(3)                                             | 3224.3(4)                                            | 622.0(3)                                           |
| <i>Z</i>                                    | 2                                                      | 2                                          | 16                                                     | 4                                                     | 4                                                     | 4                                                    | 2                                                  |
| $\rho_{\text{calcd}}$ /g cm <sup>-3</sup>   | 1.076                                                  | 1.179                                      | 1.392                                                  | 1.294                                                 | 1.482                                                 | 1.616                                                | 1.509                                              |
| $\mu$ /mm <sup>-1</sup>                     | 6.165                                                  | 2.085                                      | 8.390                                                  | 6.147                                                 | 3.143                                                 | 2.453                                                | 1.408                                              |
| <i>F</i> (000)                              | 484.0                                                  | 520.0                                      | 4448.0                                                 | 1256.0                                                | 1400.0                                                | 1544.0                                               | 292.0                                              |
| Crystal size/mm <sup>3</sup>                | 0.12 × 0.09 × 0.02                                     | 0.18 × 0.13 × 0.05                         | 0.15 × 0.07 × 0.02                                     | 0.23 × 0.14 × 0.04                                    | 0.45 × 0.21 × 0.07                                    | 0.22 × 0.11 × 0.04                                   | 0.15 × 0.08 × 0.03                                 |
| Radiation used                              | Cu K $\alpha$ ( $\lambda$ = 1.54186)                   | Mo K $\alpha$ ( $\lambda$ = 0.71073)       | Cu K $\alpha$ ( $\lambda$ = 1.54186)                   | Cu K $\alpha$ ( $\lambda$ = 1.54186)                  | Mo K $\alpha$ ( $\lambda$ = 0.71073)                  | Mo K $\alpha$ ( $\lambda$ = 0.71073)                 | Mo K $\alpha$ ( $\lambda$ = 0.71073)               |
| 2 $\theta$ range for data collection/°      | 6.712 to 143.33                                        | 3.076 to 51.752                            | 5.05 to 143.418                                        | 6.046 to 140.404                                      | 3.986 to 51.134                                       | 3.92 to 51.61                                        | 3.516 to 51.478                                    |
| Index ranges                                | −5 ≤ <i>h</i> ≤ 10                                     | −10 ≤ <i>h</i> ≤ 10                        | −22 ≤ <i>h</i> ≤ 41                                    | −31 ≤ <i>h</i> ≤ 35                                   | −30 ≤ <i>h</i> ≤ 35                                   | −36 ≤ <i>h</i> ≤ 32                                  | −7 ≤ <i>h</i> ≤ 8                                  |
|                                             | −14 ≤ <i>k</i> ≤ 15                                    | −13 ≤ <i>k</i> ≤ 15                        | −11 ≤ <i>k</i> ≤ 15                                    | −9 ≤ <i>k</i> ≤ 4                                     | −17 ≤ <i>k</i> ≤ 14                                   | −15 ≤ <i>k</i> ≤ 17                                  | −9 ≤ <i>k</i> ≤ 9                                  |
|                                             | −16 ≤ <i>l</i> ≤ 17                                    | −17 ≤ <i>l</i> ≤ 17                        | −28 ≤ <i>l</i> ≤ 27                                    | −16 ≤ <i>l</i> ≤ 16                                   | −8 ≤ <i>l</i> ≤ 7                                     | −7 ≤ <i>l</i> ≤ 9                                    | −14 ≤ <i>l</i> ≤ 14                                |
| Refl. collected                             | 11462                                                  | 9633                                       | 60397                                                  | 14812                                                 | 6839                                                  | 8493                                                 | 4139                                               |
| Independent refl.                           | 5213 [ <i>R</i> <sub>int</sub> = 0.0403]               | 5258 [ <i>R</i> <sub>int</sub> = 0.0561]   | 19487 [ <i>R</i> <sub>int</sub> = 0.0534]              | 5553 [ <i>R</i> <sub>int</sub> = 0.0412]              | 2951 [ <i>R</i> <sub>int</sub> = 0.0354]              | 3182 [ <i>R</i> <sub>int</sub> = 0.0261]             | 2312 [ <i>R</i> <sub>int</sub> = 0.0653]           |
| Data/restr./param.                          | 5213/0/244                                             | 5258/2/251                                 | 19487/135/936                                          | 5553/1/348                                            | 2951/2/197                                            | 3182/2/199                                           | 2312/0/150                                         |
| Goodness-of-fit on <i>F</i> <sup>2</sup>    | 1.045                                                  | 1.020                                      | 1.566                                                  | 1.052                                                 | 1.144                                                 | 1.078                                                | 1.028                                              |
| Final <i>R</i> indexes                      | <i>R</i> <sub>1</sub> = 0.0488                         | <i>R</i> <sub>1</sub> = 0.0626             | <i>R</i> <sub>1</sub> = 0.1434                         | <i>R</i> <sub>1</sub> = 0.0453                        | <i>R</i> <sub>1</sub> = 0.0518                        | <i>R</i> <sub>1</sub> = 0.0348                       | <i>R</i> <sub>1</sub> = 0.0665                     |
| [ <i>I</i> > 2 $\sigma$ ( <i>I</i> )]       | <i>wR</i> <sub>2</sub> = 0.1261                        | <i>wR</i> <sub>2</sub> = 0.1278            | <i>wR</i> <sub>2</sub> = 0.3794                        | <i>wR</i> <sub>2</sub> = 0.1047                       | <i>wR</i> <sub>2</sub> = 0.1344                       | <i>wR</i> <sub>2</sub> = 0.0949                      | <i>wR</i> <sub>2</sub> = 0.1597                    |
| Final <i>R</i> indexes                      | <i>R</i> <sub>1</sub> = 0.0618                         | <i>R</i> <sub>1</sub> = 0.1001             | <i>R</i> <sub>1</sub> = 0.1974                         | <i>R</i> <sub>1</sub> = 0.0584                        | <i>R</i> <sub>1</sub> = 0.0626                        | <i>R</i> <sub>1</sub> = 0.0417                       | <i>R</i> <sub>1</sub> = 0.0947                     |
| [all data]                                  | <i>wR</i> <sub>2</sub> = 0.1355                        | <i>wR</i> <sub>2</sub> = 0.1459            | <i>wR</i> <sub>2</sub> = 0.4676                        | <i>wR</i> <sub>2</sub> = 0.1132                       | <i>wR</i> <sub>2</sub> = 0.1425                       | <i>wR</i> <sub>2</sub> = 0.0980                      | <i>wR</i> <sub>2</sub> = 0.1815                    |
| Largest diff. peak/hole / e Å <sup>-3</sup> | 0.34/−0.52                                             | 0.50/−0.51                                 | 2.65/−0.99                                             | 0.40/−0.36                                            | 1.14/−0.58                                            | 1.35/−1.03                                           | 0.52/−1.31                                         |
| Flack parameter                             |                                                        |                                            | 0.29(3)                                                | −0.003(8)                                             |                                                       |                                                      |                                                    |
| CCDC No.                                    | 2300615                                                | 2300616                                    | 2300617                                                | 2300618                                               | 2300619                                               | 2300620                                              | 2300621                                            |



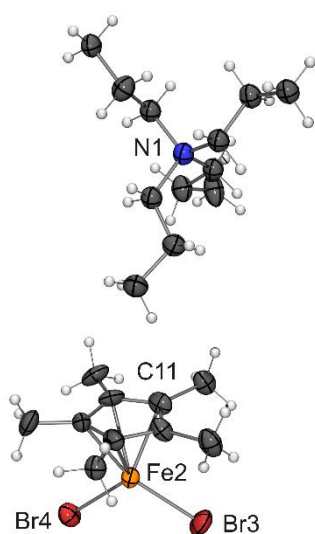

**Figure S1.** Molecular structure of  $\text{NnPr}_4[\text{Fe}(\eta^5\text{-Cp}^*)\text{Br}_2]$  in the crystal (ORTEP with 50% probability ellipsoids). The asymmetric unit contains four anions and four cations. Only one each is shown.



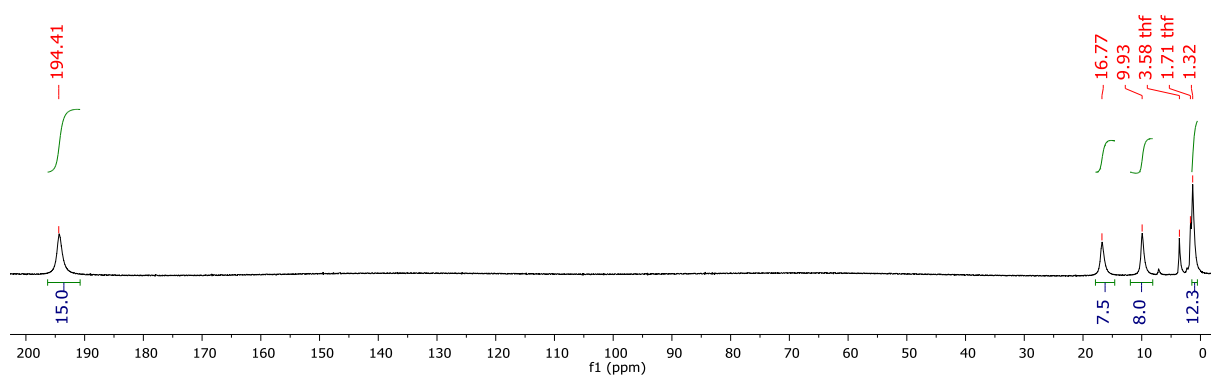

**Figure S2.**  $^1\text{H}$  NMR spectrum (400 MHz,  $\text{THF-}d_8$ ) of  $\text{NnPr}_4[\text{Fe}(\eta^5\text{-Cp}^*)\text{Cl}_2]$ .

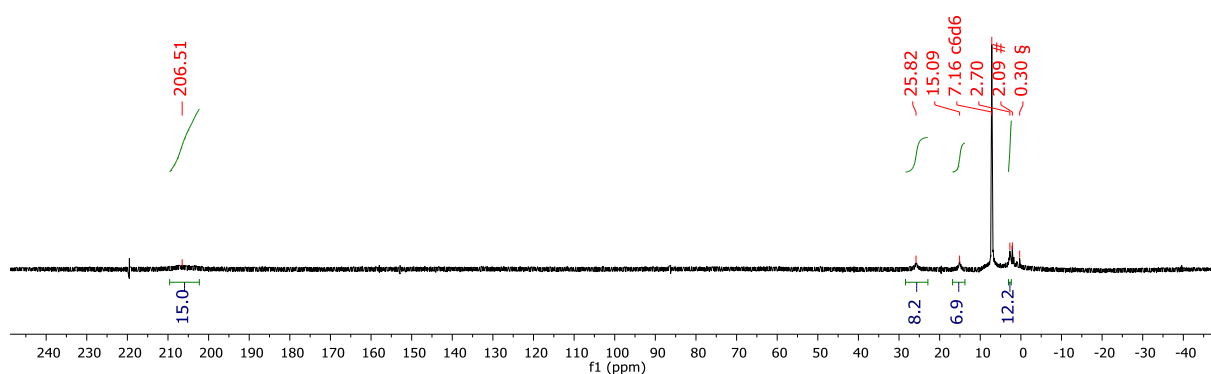

**Figure S3.**  $^1\text{H}$  NMR spectrum (400 MHz,  $\text{THF-}d_8$ ) of  $\text{NnPr}_4[\text{Fe}(\eta^5\text{-Cp}^*)\text{BrCl}]$ . Signals marked belong to small amounts of decamethylferrocene (#) and silicone grease (§).

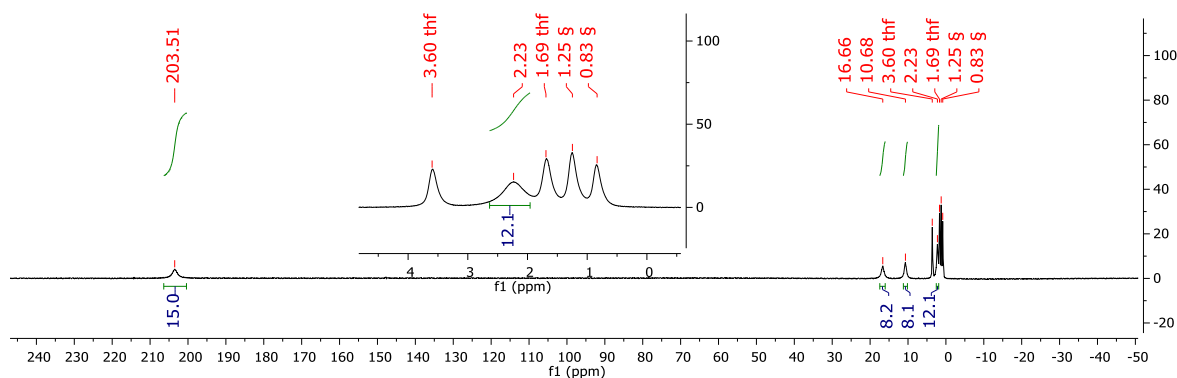

**Figure S4.**  $^1\text{H}$  NMR spectrum (400 MHz,  $\text{THF-}d_8$ ) of  $\text{NnPr}_4[\text{Fe}(\eta^5\text{-Cp}^*)\text{Br}_2]$ . Signals marked belong to residual *n*-hexane (§).



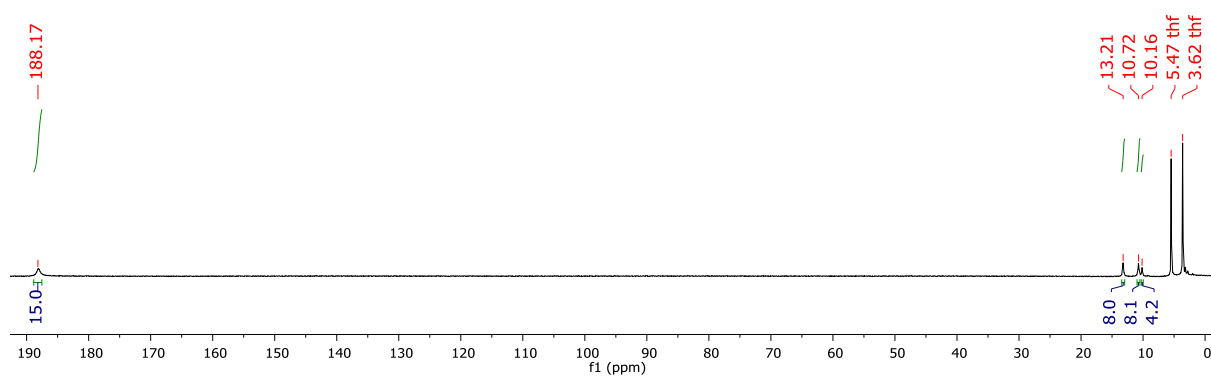

**Figure S5.** <sup>1</sup>H NMR spectrum (500 MHz, THF-*d*<sub>8</sub>) of PPh<sub>4</sub>[Fe(η<sup>5</sup>-Cp\*)Cl<sub>2</sub>].

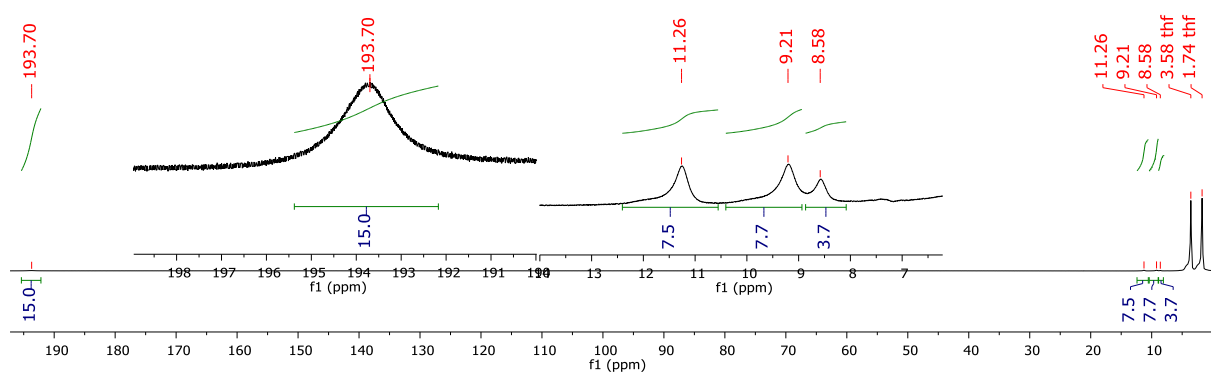

**Figure S6.** <sup>1</sup>H NMR spectrum (500 MHz, THF-*d*<sub>8</sub>) of PPh<sub>4</sub>[Fe(η<sup>5</sup>-Cp\*)Br<sub>2</sub>].

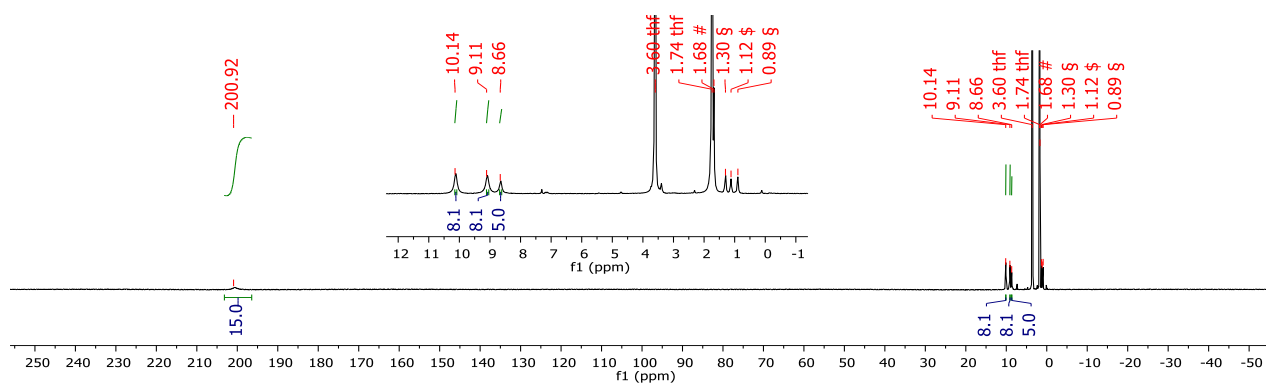

**Figure S7.** <sup>1</sup>H NMR spectrum (500 MHz, THF-*d*<sub>8</sub>) of PPh<sub>4</sub>[Fe(η<sup>5</sup>-Cp\*)I<sub>2</sub>]. Signals marked belong to residual n-hexane (\$), decamethylferrocene (#) and an unknown impurity (\$).



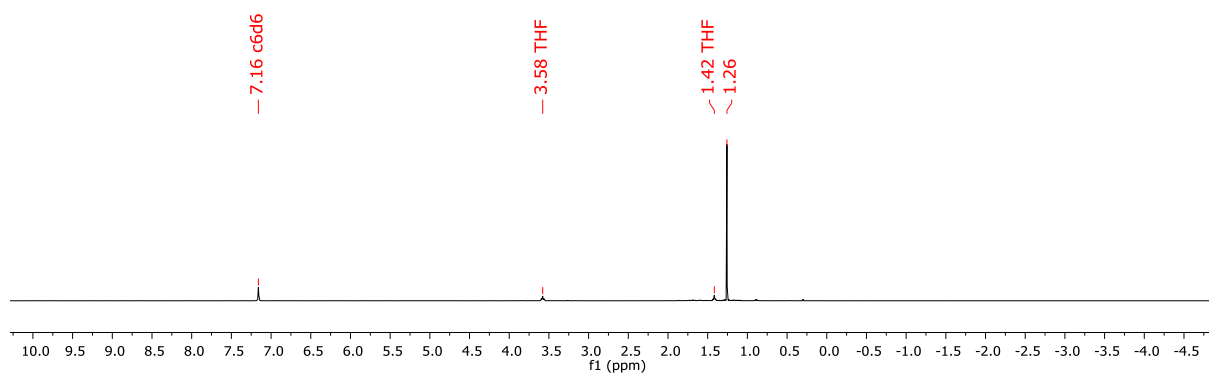

**Figure S8.** <sup>1</sup>H NMR spectrum (400 MHz, C<sub>6</sub>D<sub>6</sub>) of [Fe(η<sup>5</sup>-Cp\*)Cl(CO)<sub>2</sub>].

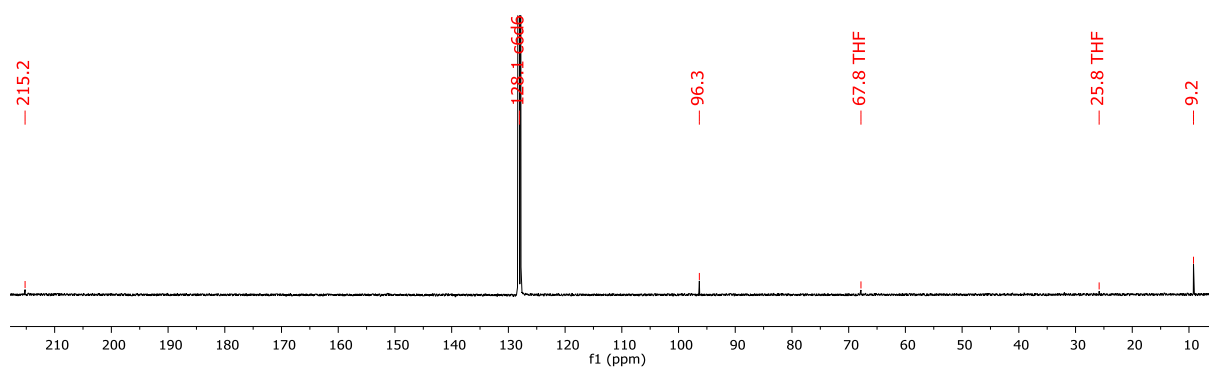

**Figure S9.** <sup>13</sup>C NMR spectrum (101 MHz, C<sub>6</sub>D<sub>6</sub>) of [Fe(η<sup>5</sup>-Cp\*)Cl(CO)<sub>2</sub>].
